# Supplementary material for: Aligning 3D nanofibrous networks from self-assembled phenylalanine nanofibers
Source: Royal Society of Chemistry journal article supplement (doi:10.1039/c4ra13159b), 2014-12-22
Supplement: c4ra13159b1.pdf [file c4ra13159b1.pdf]

## Electronic Supplementary Information (ESI)

### Aligning 3D nanofibrous networks from self-assembled phenylalanine nanofibers

Xianfeng Wang,<sup>a</sup> Yi Charlie Chen<sup>b</sup> and Bingyun Li<sup>\*a</sup>

<sup>a</sup>*Department of Orthopaedics, School of Medicine, West Virginia University, Morgantown, WV 26506, United States*

<sup>b</sup>*Department of Biology, Natural Science Division, Alderson-Broaddus University, Philippi, WV 26416, United States*

*\*Correspondence to:*

Bingyun Li, PhD, Associate Professor  
Director, Biomaterials, Bioengineering & Nanotechnology Laboratory  
Department of Orthopaedics  
School of Medicine, West Virginia University  
1 Medical Center Drive  
Morgantown, WV26506-9196, USA  
Email: [bili@hsc.wvu.edu](mailto:bili@hsc.wvu.edu)  
URL: <http://medicine.hsc.wvu.edu/ortho-bli/>

#### *Nanofiber formation from Phe self-assembly*

At millimolar concentrations, Phe can self-assemble into nanofibers.<sup>1, 2</sup> Fig. S1a-d present the FE-SEM images of self-assembled Phenanofibers prepared from different concentrations of Phe solutions, indicating that nanofibers with diameters of 50-400 nm can be formed at various Phe concentrations. Concentrations higher than 150 mM were not investigated due to solubility issues. Typical topography of self-assembled Phenanofibers was also obtained using AFM (Fig.S1e). Fig.S1f shows the diameter distribution histogram of Phenanofibers obtained from a Phe concentration of 100 mM, which reveals that the average diameter of the nanofibers was 160 nm, and most (over 75%) Phenanofibers were in the range 100-200 nm.

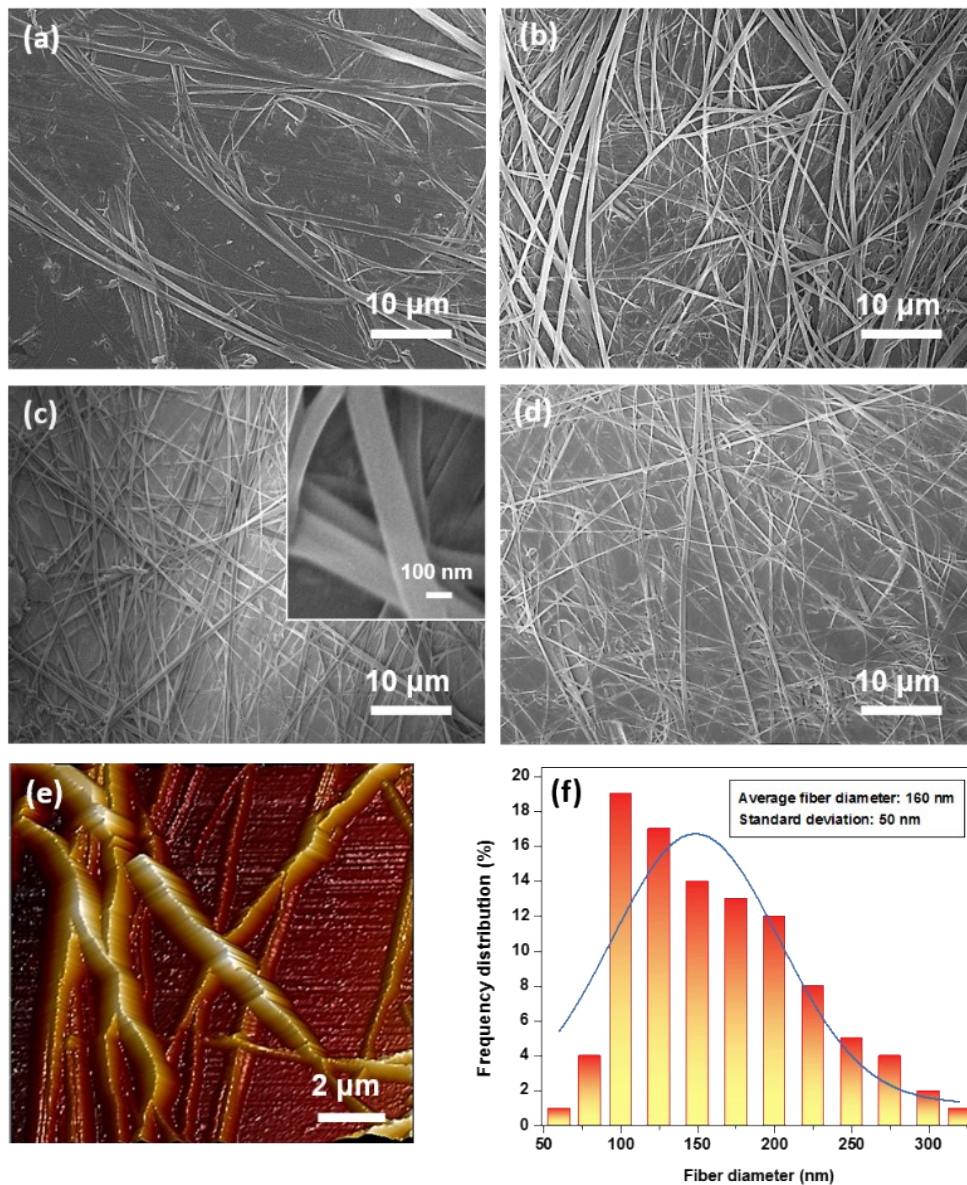

**Fig. S1.**(a-d) FE-SEM images of Phenanofibers obtained by conventional drop-casting of Phe solution at a concentration of (a) 25, (b) 50, (c) 100, and (d) 150 mM, respectively. Inset shows a high magnification image. (e) AFM image of Phenanofibers from (c). (f) Diameter distribution of Phenanofiber presented in (c).

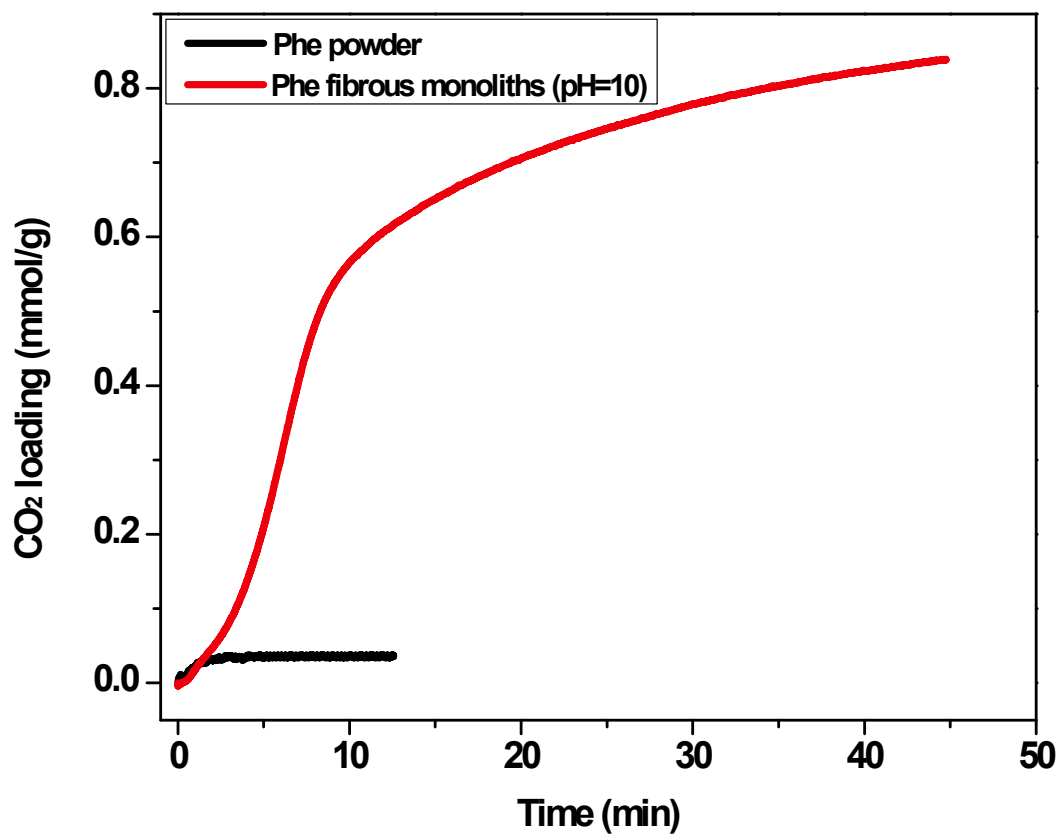

**Fig. S2.** CO<sub>2</sub> capture performance of Phe nanofibrous monoliths obtained from a Phe solution of pH10 and Phe powders.

## References

- 1.S. Perween, B. Chandanshive, H. C. Kotamarthi and D. Khushalani, *Soft Matter*, 2013, **9**, 10141-10145.
- 2.L. Adler-Abramovich, D. Aronov, P. Beker, M. Yevnin, S. Stempler, L. Buzhansky, G. Rosenman and E. Gazit, *Nat. Nanotechnol.*, 2009, **4**, 849-854.
